1 **Seroprevalence of measles and varicella in healthcare workers in Chonburi province,**  
2 **Thailand between October 2022 and January 2023**

3

4 Apirat Katanyutanon<sup>1</sup>, Wichai Thanasophon<sup>1</sup>, Chaninan Sonthichai<sup>2</sup>, Piyada  
5 Angsuwatcharakorn<sup>2</sup>, Jira Chansaenroj<sup>3</sup>, Ratchathorn Nakabut<sup>4</sup>, Sarandhorn Naritpavalun<sup>4</sup>,  
6 Yanathep Prasitsomsakul<sup>4</sup>, Paranyu Surakhot<sup>4</sup>, Phuvich Pompim<sup>4</sup>, Nasamon Wanlapakorn<sup>3,5</sup>,  
7 Yong Poovorawan<sup>3,6\*</sup>

8

9 <sup>1</sup> Chonburi Provincial Public Health Office, Bansuan, Mueang Chonburi, Chonburi, 20000,  
10 Thailand.

11 <sup>2</sup> Vaccine protection, Division of Communicable Diseases, Department of Disease Control,  
12 Ministry of Public Health, Nonthaburi, Thailand

13 <sup>3</sup> Center of Excellence in Clinical Virology, Department of Pediatrics, Faculty of Medicine,  
14 Chulalongkorn University, Bangkok 10330, Thailand

15 <sup>4</sup> Secondary school, Triamudomsuksa School, Bangkok, Thailand

16 <sup>5</sup> Division of Academic Affairs, Faculty of Medicine, Chulalongkorn University

17 <sup>6</sup> FRS(T), the Royal Society of Thailand, Sanam Sueapa, Dusit, Bangkok, 10300, Thailand

18

19 **Running head:** Seroprevalence of measles and varicella in healthcare workers

20 \*Corresponding author

21 Address for correspondence: Yong Poovorawan, M.D. Center of Excellence in Clinical  
22 Virology, Department of Pediatrics, Faculty of Medicine, Chulalongkorn University,  
23 Bangkok, Thailand. E-mail: yong.p@chula.ac.th

24

**NOTE: This preprint reports new research that has not been certified by peer review and should not be used to guide clinical practice.**

25 **Abstract**

26 *Introduction:* Health care workers (HCWs) face the risk of contracting and transmitting  
27 vaccine-preventable infectious diseases (VPDs). Therefore, it is crucial to evaluate the  
28 immune status of HCWs against certain VPDs, such as measles and varicella zoster virus  
29 (VZV). This study aimed to determine age-specific seropositivity rates of anti-measles and  
30 anti-VZV IgG in HCWs working in Chonburi province, Thailand, and to develop a measles  
31 and varicella vaccination policy for Thai HCWs.

32 *Methods:* A total of 266 HCWs in Chonburi Province, Thailand, were enrolled in this study  
33 between October 2022 and January 2023. Participants were divided into six age groups: 21-  
34 30, 31-40, 41-50, 51-60, 61-70, and >70 years. Anti-measles and anti-VZV IgG levels were  
35 evaluated using commercial ELISA kits (EUROIMMUN, Lübeck, Germany).

36 *Results:* The overall seropositivity rates for measles and varicella were 85.0% and 81.2%,  
37 respectively. The lowest seropositivity rates for both measles and varicella were found among  
38 the 21-30-year-old group. Furthermore, seropositivity rates increased with age, reaching  
39 100% among people over the age of 60 years.

40 *Conclusions:* To prevent measles and VZV outbreaks in HCWs, it is crucial to implement  
41 catch-up measles and varicella vaccination programs, particularly among HCWs younger  
42 than 30 years of age.

43 **Keywords:** Seroprevalence, Measles, Varicella, Healthcare workers

44

45

46

47

48

49

## 50 **Introduction**

51 Measles and varicella zoster virus (VZV) are extremely contagious diseases that  
52 manifest with skin eruptions. The secondary attack rate of measles and varicella ranges  
53 between 70% and 90% among susceptible exposed individuals [1]. The basic reproduction  
54 number of measles and varicella ranges from 13 to 18 and 3.7 to 5.0, respectively [2, 3]. The  
55 measles vaccine was developed in the 1970s and was integrated into the Expanded  
56 Programme on Immunization (EPI) worldwide in 1974 [4]. The live attenuated varicella  
57 vaccine, derived from the VZV Oka strain, has been licensed for more than a decade [5, 6].  
58 Despite the decline in the incidence of measles and varicella resulting from widespread  
59 vaccination efforts, outbreaks of these two diseases have been reported in settings where  
60 children gather, such as childcare centers and schools, in hospitals, institutionalized children  
61 and adults' facilities, refugee camps, and among healthcare workers (HCWs) [7-10].

62 HCWs are at increased risk for measles than the general population. In the United  
63 States, 78 documented cases of measles were attributed to transmission within healthcare  
64 facilities [11]. Furthermore, 29 healthcare personnel contracted the virus through  
65 occupational exposure, with one individual transmitting the measles virus to a patient.  
66 Consequently, the CDC's Advisory Committee on Immunization Practices (ACIP)  
67 recommends that HCWs who were born before 1957 or who lack serological evidence of  
68 immunity or prior vaccination should receive a two-dose regimen of the measles-mumps-  
69 rubella (MMR) vaccine, with a minimum interval of four weeks between doses [12].

70 The VZV vaccine, also known as chickenpox vaccine, is a live-attenuated vaccine for  
71 protection against chickenpox (varicella) [7, 13]. The currently licensed varicella vaccines are  
72 highly effective in preventing varicella and its complications [14, 13]. However, varicella  
73 outbreaks have been reported, including among healthcare workers in Thailand [15]. Previous  
74 seroprevalence studies showed high levels of seronegativity among healthcare workers

75 ranging from 14–15.6% in Malaysia and Saudi Arabia, to as high as 51% among first-year  
76 medical and engineering students in Sri Lanka [16-18]. In Thailand, the varicella vaccine is  
77 an optional vaccine. Thus, the coverage is low. A previous study of VZV seroprevalence in  
78 Thailand conducted among university students found that 26% were seronegative to anti-  
79 VZV antibodies, suggesting that one in four young Thai adults remained susceptible to  
80 varicella [19]. The CDC's ACIP recommends that for varicella, HCWs born after 1970,  
81 without a history of varicella and/or a negative result on the antibody screening test, are  
82 advised to receive a two-dose vaccination series.

83 To develop a measles and varicella vaccination policy for Thai HCWs, it is important  
84 to understand the seroprevalence of these two diseases. Currently, there are neither  
85 serological screening nor a catch-up vaccination campaign in the HCWs working in Chonburi  
86 Province, Thailand. This study aimed to investigate the immune status of HCWs against  
87 measles and varicella in a variety of healthcare settings located in Chonburi province,  
88 Thailand and to define an appropriate vaccination program among HCWs.

89

## 90 **Methods**

### 91 *Study design and ethical considerations*

92 This cross-sectional study was part of the large-scale serosurvey conducted in 11  
93 districts in Chonburi province, Thailand, between October 2022 and January 2023 [20]. In  
94 the large-scale serosurvey, there was a total of 1193 general population and 266 HCWs. The  
95 cluster random sampling method was used to enroll participants. The stratified clusters within  
96 the 11 districts were divided into urban and rural strata. From each district, each cluster was  
97 selected using the probability proportionate-to-size sampling method. Healthcare workers  
98 were selected from distinct-level health facilities within each district using consecutive

99 sampling in each district. In the present study, only serological samples from 266 HCWs  
100 were analyzed.

101 The protocol received approval from the Institutional Review Board of the Faculty of  
102 Medicine of Chulalongkorn University (IRB numbers 0706/65). This study adhered to the  
103 ethical principles stated in the Declaration of Helsinki and followed the principles of good  
104 clinical practice. Prior to their participation in the study, written consent was obtained from  
105 each participant.

106  
107 *Participants and Sample Collection*

108 HCWs were approached for eligibility. Exclusion criteria included aged <18 years or  
109 > 80 years, having immunosuppressive disorders, malignancy, or diseases that require  
110 immunosuppressive agents. A structured questionnaire was applied to voluntary HCWs. The  
111 data collected in this study included age, sex, history of measles and varicella infection, and  
112 previous vaccination.

113 Blood samples of 3-5 milliliters (mL) were collected and subsequently subjected to  
114 centrifugation to obtain serum samples, which were aliquoted and stored at -20°C until further  
115 laboratory tests.

116  
117 *Laboratory testing*

118 *Seroprevalence of Measles and VZV*

119 Commercial enzyme-linked immunosorbent assay (ELISA) kits were used according  
120 to the manufacturer's instructions to measure IgG concentrations against measles and VZV  
121 (EURROIMMUN, Lubeck, Germany). Serum samples were initially diluted 1:100 and then  
122 further diluted to obtain values within the detection range. Anti-measles and anti-VZV IgG

123 concentrations are expressed in international units per liter (IU/L). The cut-off for  
124 seropositivity and seroprotection rate against measles in this study was  $\geq 275$  IU/L. The cut-  
125 off for seropositivity and seroprotection rate against varicella in this study was  $\geq 110$  IU/L.

126  
127 *Statistical Analysis*

128 Data on the seropositivity rates of anti-measles IgG and anti-VZV IgG are presented  
129 as numbers and percentages. Geometric mean titers (GMT) were calculated. The associations  
130 between sex and GMT were performed using Person's chi-square test. Comparison of  
131 logarithmic-transformed GMTs between groups was compared using one-way ANOVA. All  
132 statistical analyses were performed with SPSS v23.0 (IBM Corp., Chicago, IL). Figures were  
133 generated using GraphPad Prism v9.4.1 (GraphPad Software, San Diego, CA). A *p*-  
134 value  $< 0.05$  was considered statistically significant.

135

136 **Results**

137 *Demographic characteristics of study participants*

138 In this study, a total of 266 HCWs were included for the seroprevalence studies of  
139 measles and varicella. The mean age was 38.3 years (Table 1). There were more female than  
140 male participants in this study (77.8% female versus 22.2% male). Most of the HCWs were  
141 between 21-30 years old, followed by 31-40 years and 41-50 years old. Only 5.6% of the  
142 HCWs (15/266) indicated that they had contracted measles, while 21.8% (58/266) reported  
143 having been vaccinated against measles. On the contrary, up to 48.1% (128/266) indicated  
144 that they had contracted varicella, while only 4.9% (13/266) reported having been vaccinated  
145 against varicella.

146 *Seroprotection rates and GMTs against measles and VZV in healthcare workers*

147 Table 2 shows the proportion of HCWs who achieved seroprotection rates against  
148 measles and their GMTs by age groups. Overall, 85% of the HCWs in this study had an anti-  
149 measles IgG of > 275 IU/L with a GMT of 1128.0 (964.5 – 1320.0) IU/L. A high  
150 seroprotection rate (>98%) was observed in older individuals 41 years of age. The lowest  
151 seroprotection rate was found among HCWs in the age group of 21–30 years (68.2%).  
152 HCWs in the 41-50- and 51-60-year-old age groups had significantly higher anti-measles IgG  
153 GMTs than the 21-30-old age group as shown in Table 2 ( $p$ -value < 0.001). There were no  
154 significant differences in GMT between male and female HCWs ( $p$ -value = 0.457).

155 Table 3 shows the proportion of HCWs who achieved the seroprotection rate against  
156 varicella and their GMTs by age groups. A total of 81.2% (216/266) of HCWs achieved a  
157 seroprotection rate against varicella, with a GMT of 394.0 (315.4-492.0) IU/L. Similar to  
158 measles, a high seroprotection rate (>90%) was observed in older individuals from 41 years  
159 of age. The lowest seroprotection rate for varicella was also found among HCWs in the 21–  
160 30-year-old age group (64.8%). HCWs in the 41-50- and 51-60-year-old age groups had  
161 significantly higher anti-VZV IgG GMTs than the 21-30-old age group as shown in Table 3  
162 ( $p$ -value < 0.05). No significant differences in the seroprotection rate were found between  
163 male and female HCWs ( $p$ -value = 0.508). In particular, the seroprotection rate against  
164 measles and VZV gradually increased with age and reached 100% in HCWs over 60 years of  
165 age.

166 *Correlation between serological results and self-reported medical history.*

167 Table 4 shows the correlation between the seroprotection rates against measles and  
168 VZV and the history of previous vaccination and infection. HCWs with a self-reported  
169 history of previous measles infection or vaccination had protective levels of anti-measles IgG  
170 in 86.7-89.7% of cases, but not significantly higher than in those who did not report previous  
171 infection or vaccination. On the contrary, a history of previous varicella was more frequent

172 among those who were immune to varicella ( $p$ -value = 0.018) than among those who were  
173 susceptible. HCWs who reported having no previous vaccination against varicella were more  
174 likely to be immune ( $p$ -value < 0.001), suggesting that the positive serological results were  
175 due to natural infection. The positive predictive value of the history of varicella was 89.84%,  
176 where it was 86.67% for the history of measles (Table 5). The positive predictive value of the  
177 history of varicella vaccination was 76.92%, where it was 89.66% for the history of measles  
178 vaccination. The negative predictive value of the was low for both measles and varicella  
179 infection and vaccination in this study.

180

## 181 **Discussion**

182 Vaccination for HCWs is an essential step in protecting not only HCWs but also  
183 patients and communities [21, 22]. To establish an effective immunization program, a  
184 serological survey is necessary to obtain the immune status of HCWs, together with a history  
185 of previous infection and vaccination, are necessary. Our study showed high seroprotection  
186 rates of more than >90% for measles (anti-measles IgG > 275 IU/L) and VZV (anti-VZV IgG  
187 > 110 IU/L) in HCWs older than 41 years working in Chonburi Province, Thailand, even  
188 when the policy for the screening and vaccination campaign in HCWs has not been  
189 implemented. This preexisting immunity is likely to result from natural exposure before the  
190 EPI for measles and varicella vaccinations were in place for all infants. On the contrary,  
191 individuals between 21-30 years of age who were born under the universal measles  
192 vaccination for all infants at 9 months of age had the lowest seroprotection rate for measles.  
193 A recent seroprevalence survey in Thai adolescents also showed that, despite 70%  
194 documented one- or two-dose measles vaccination during childhood, only half of the  
195 adolescents had anti-measles IgG greater than 275 IU/L, likely due to the decline of  
196 antibodies without natural exposure or primary vaccine failure [23]. Thus, in this study,



197 HCWs younger than 30 years of age who could have been vaccinated against measles under  
198 the EPI program could possibly have anti-measles immunity that waned overtime.  
199 Furthermore, the second dose of measles-containing vaccine coverage among Thai children  
200 reached more than 80% of the population only after 2016, suggesting that a large number of  
201 populations may have received only one dose of measles-containing vaccine during  
202 childhood [24]. Thus, it is important to prioritize a catch-up campaign for measles  
203 vaccination for young healthcare workers who had no history of two-dose measles  
204 immunization or had negative serology.

205 In the present study, the overall seroprotection rate for measles in HCWs was lower  
206 than in the general population over 26 years of age in our previous serosurvey conducted in  
207 2014 (85% versus 97.7%) [25]. The younger generation of the 2030s, having been born under  
208 the Expanded Program on Immunization (EPI) with improved vaccine coverage, may possess  
209 vaccine-induced immunity that diminishes over time, resulting in lower seroprevalence rates  
210 during adulthood compared to the previous survey 10 years ago. Additionally, comparison of  
211 anti-measles seroprevalence among HCWs from different regions showed that HCWs from  
212 high-income countries had a higher rate of measles seroprevalence ranging from 87% to 97%  
213 than HCWs in our study [9].

214 Our study showed that the overall seroprotection rate against varicella was 81.2%  
215 This rate was lower compared to HCWs in Japan (96.3%) [26], Finland (99%) [27], Denmark  
216 (98.6%) [28], and Korea (91%) [29, 30]. In Thailand, older individuals acquired immunity to  
217 varicella through natural exposure, while younger individuals may have received varicella  
218 vaccination, which are optional vaccines, or may have contracted the disease during  
219 childhood. Therefore, younger HCWs are likely to have a low seroprotection rate compared  
220 to older HCWs due to the low coverage of optional vaccines and the lack of exposure to  
221 natural infection. Other countries also reported low anti-VZV seroprevalence rates in the

222 young population [31]. Based on our results, it is recommended to prioritize varicella  
223 vaccination for HCWs in the 21-30 age group with negative serology and no record of two-  
224 dose varicella vaccination.

225         The correlation between self-reported history and seroprotected status showed that  
226 neither history of measles vaccination nor history of measles were associated with  
227 seroprotected status. Our results are consistent with other studies showing that self-reported  
228 vaccination history may not be predictive and reliable [27]. Therefore, when a measles  
229 vaccination record was not available, serologic tests should be performed to provide evidence  
230 of measles immunity. Unlike measles, we found that a history of previous varicella was more  
231 frequent among those who were immune to varicella. This is similar to the report of a Thai  
232 university student showing the significant association between the history of varicella and the  
233 seropositivity rate [19]. Consistent with a previous report, negative predictive values for both  
234 previous vaccination and infection were very low for both measles and varicella [30]. Our  
235 research indicates the necessity of implementing a universal record system to document  
236 vaccine administration for every individual in Thailand. The universal record system could  
237 potentially reduce unnecessary serologic screening and catch-up vaccinations.

238         This study has some limitations. First, the participants' history of vaccination and  
239 previous infection was only obtained through questionnaires, which resulted in missing  
240 information and uncertain information regarding diagnosis, actual vaccination doses, and  
241 dates. Selecting HCWs from one province may not fully represent all HCWs in Thailand. A  
242 larger study that explores other regions of Thailand could provide a more comprehensive  
243 representation of the entire country. Additionally, the small sample size of participants older  
244 than 60 years makes it challenging to draw conclusive results.

245

246 **Conclusions**

247           This study provides comprehensive information to inform policy makers and establish  
248 effective measles and varicella immunization programs for HCWs throughout the country. To  
249 prevent measles and VZV outbreaks in HCWs, it is crucial to conduct serological screening  
250 and implement catch-up measles and varicella vaccination programs, particularly among  
251 HCWs younger than 30 years of age.

252

### 253 **Acknowledgements**

254 We greatly appreciate the kind contributions and collaboration of all participants. With all of  
255 their help, the interesting information obtained from this study could be used for the future  
256 development of vaccine strategies. We thank all staff from the hospitals in Chonburi Province  
257 for enrolling participants and staff from the Center of Excellence in Clinical Virology,  
258 Faculty of Medicine, Chulalongkorn University, for their help with the laboratory testing.

259

### 260 **Ethics approval**

261 The study protocol was reviewed and approved by the Institutional Review Board (IRB),  
262 Faculty of Medicine, Chulalongkorn University (IRB 0706/65). Written informed consent  
263 was waived by the IRB.

264

### 265 **Conflict of interest statement**

266 The authors have no conflict of interest to declare.

267

### 268 **Funding**

269 This research was financially supported by the Health Systems Research Institute (HSRI), the  
270 National Research Council of Thailand (NRCT), the Research Chair Grant from the National  
271 Science and Technology Development Agency (P-15-50004), the Center of Excellence in

272 Clinical Virology, Chulalongkorn University, and King Chulalongkorn Memorial Hospital  
273 and the Second Century Fund (C2F) of Jira Chansaenroj, Chulalongkorn University. The  
274 funders had no role in study design, data collection, analysis, publication decision, or  
275 manuscript preparation.

276

### 277 **Author contributions**

278 Conceptualization: Y.P.; Data curation: A.K., W.T., J.C., N.W.; Formal analysis: A.K., J.C.,  
279 N.W.; Funding acquisition: J.C., Y.P.; Investigation: A.K., W.T.; Methodology: A.K., J.C.;  
280 Project administration: J.C., R.N., S.N., Y.P., P.S., P.P.; Resources: A.K., W.T., C.S., P.A.;  
281 Software: J.C., N.W.; Supervision: Y.P.; Validation: A.K., N.W., Y.P.; Visualization: J.C.;  
282 Roles/Writing - original draft: A.K., J.C., R.N., S.N., Y.P., P.S., P.P., N.W. ;and Writing –  
283 review & editing: A.K., N.W.

284

### 285 **Data availability statement**

286 The authors confirm that all data supporting the findings of this study are available within the  
287 article.

288

### 289 **References**

290

- 291 [1] Lee JS, Jeong O, Yang H. Screening and Vaccination Against Measles and Varicella  
292 Among Health Care Workers: A Cost-effectiveness Analysis. *Asia Pac J Public*  
293 *Health*. 2021 Jul;33(5):508-515. doi: 10.1177/10105395211026468. Epub 2021 Jun  
294 24. PMID: 34165349.
- 295 [2] Guerra FM, Bolotin S, Lim G, Heffernan J, Deeks SL, Li Y, et al. The basic  
296 reproduction number (R(0)) of measles: a systematic review. *Lancet Infect Dis*. 2017

- 297 Dec;17(12):e420-e428. doi: 10.1016/S1473-3099(17)30307-9. Epub 2017 Jul 27.
- 298 PMID: 28757186.
- 299 [3] Marangi L, Mirinaviciute G, Flem E, Scalia Tomba G, Guzzetta G, Freiesleben de  
300 Blasio B, et al. The natural history of varicella zoster virus infection in Norway:  
301 Further insights on exogenous boosting and progressive immunity to herpes zoster.  
302 PLoS One. 2017;12(5):e0176845. doi: 10.1371/journal.pone.0176845. PMID:  
303 28545047; PMCID: PMC5436649.
- 304 [4] Okwo-Bele JM, Cherian T. The expanded programme on immunization: a lasting  
305 legacy of smallpox eradication. *Vaccine*. 2011 Dec 30;29 Suppl 4:D74-79. doi:  
306 10.1016/j.vaccine.2012.01.080. PMID: 22486980.
- 307 [5] Hinman A. Eradication of vaccine-preventable diseases. *Annu Rev Public Health*.  
308 1999;20:211-229. doi: 10.1146/annurev.publhealth.20.1.211. PMID: 10352857.
- 309 [6] Arvin AM, Greenberg HB. New viral vaccines. *Virology*. 2006 Jan 5;344(1):240-249.  
310 doi: 10.1016/j.virol.2005.09.057. PMID: 16364754.
- 311 [7] Gershon AA. Viral vaccines of the future. *Pediatr Clin North Am*. 1990  
312 Jun;37(3):689-707. doi: 10.1016/s0031-3955(16)36911-5. PMID: 2161508.
- 313 [8] Baxter R, Ray P, Tran TN, Black S, Shinefield HR, Coplan PM, et al. Long-term  
314 effectiveness of varicella vaccine: a 14-Year, prospective cohort study. *Pediatrics*.  
315 2013 May;131(5):e1389-96. doi: 10.1542/peds.2012-3303. Epub 2013 Apr 1. PMID:  
316 23545380.
- 317 [9] Haviari S, Benet T, Saadatian-Elahi M, Andre P, Loulergue P, Vanhems P.  
318 Vaccination of healthcare workers: A review. *Hum Vaccin Immunother*.  
319 2015;11(11):2522-2537. doi: 10.1080/21645515.2015.1082014. PMID: 26291642;  
320 PMCID: PMC4685699.

- 321 [10] Minta AA, Ferrari M, Antoni S, Portnoy A, Sbarra A, Lambert B, et al. Progress  
322 Toward Regional Measles Elimination - Worldwide, 2000-2021. *MMWR Morb*  
323 *Mortal Wkly Rep.* 2022 Nov 25;71(47):1489-1495. doi: 10.15585/mmwr.mm7147a1.  
324 PMID: 36417303; PMCID: PMC9707362.
- 325 [11] Fiebelkorn AP, Redd SB, Kuhar DT. Measles in Healthcare Facilities in the United  
326 States During the Postelimination Era, 2001-2014. *Clin Infect Dis.* 2015 Aug  
327 15;61(4):615-618. doi: 10.1093/cid/civ387. Epub 2015 May 15. PMID: 25979309;  
328 PMCID: PMC4646220.
- 329 [12] Advisory Committee on Immunization P, Centers for Disease C, Prevention.  
330 Immunization of health-care personnel: recommendations of the Advisory Committee  
331 on Immunization Practices (ACIP). *MMWR Recomm Rep.* 2011 Nov 25;60(RR-7):1-  
332 45. PMID: 22108587.
- 333 [13] Weinmann S, Naleway AL, Koppolu P, Baxter R, Belongia EA, Hambidge SJ, et al.  
334 Incidence of Herpes Zoster Among Children: 2003-2014. *Pediatrics.* 2019 Jul;144(1).  
335 doi: 10.1542/peds.2018-2917. Epub 2019 Jun 10. PMID: 31182552; PMCID:  
336 PMC7748320.
- 337 [14] Salvetti A, Ferrari V, Garofalo R, Gazzaniga P, Guerroni A, Metrucci A, et al.  
338 Incidence of herpes zoster and postherpetic neuralgia in Italian adults aged  
339  $\geq 50$  years: A prospective study. *Prev Med Rep.* 2019 Jun;14:100882. doi:  
340 10.1016/j.pmedr.2019.100882. PMID: 31193254; PMCID: PMC6522697.
- 341 [15] Apisarnthanarak A, Kitphati R, Tawatsupha P, Thongphubeth K, Apisarnthanarak P,  
342 Mundy LM. Outbreak of varicella-zoster virus infection among Thai healthcare  
343 workers. *Infect Control Hosp Epidemiol.* 2007 Apr;28(4):430-434. doi:  
344 10.1086/512639. Epub 2007 Feb 26. PMID: 17385149.

- 345 [16] Almuneef MA, Memish ZA, Balkhy HH, Otaibi B, Helmi M. Seroprevalence survey  
346 of varicella, measles, rubella, and hepatitis A and B viruses in a multinational  
347 healthcare workforce in Saudi Arabia. *Infect Control Hosp Epidemiol.* 2006  
348 Nov;27(11):1178-1183. doi: 10.1086/508826. Epub 2006 Oct 17. PMID: 17080374.
- 349 [17] Sam IC, Tariman H, Chan YF, Bador MK, Yusof MY, Hassan H. Varicella-zoster  
350 virus seroprevalence in healthcare workers in Kuala Lumpur, Malaysia. *Med J*  
351 *Malaysia.* 2008 Dec;63(5):429-430. PMID: 19803311.
- 352 [18] Kurukulasooriya GM, Thevanesam V, Agampodi SB, Abeykoon AM, Amarasiri SP,  
353 Goonasekera KP. Susceptibility of New Entrant University students in Sri Lanka to  
354 varicella zoster infection. *Asia Pac J Public Health.* 2010 Apr;22(2):219-224. doi:  
355 10.1177/1010539509334625. Epub 2009 May 1. PMID: 19411280.
- 356 [19] Bhattarakosol P, Chantarabul S, Pittayathikhun K, Mung-mee V, Punnarugsa V.  
357 Prevalence of anti-varicella zoster IgG antibody in undergraduate students. *Asian Pac*  
358 *J Allergy Immunol.* 1996 Dec;14(2):129-31. PMID: 9177828.
- 359 [20] Chansaenroj J, Suntronwong N, Kanokudom S, Assawakosri S, Vichaiwattana P,  
360 Klinfueng S, et al. Seroprevalence of SARS-CoV-2 anti-nucleocapsid total Ig, anti-  
361 RBD IgG antibodies, and infection in Thailand: a cross-sectional survey from October  
362 2022 to January 2023. *Sci Rep.* 2023 Sep 20;13(1):15595. doi: 10.1038/s41598-023-  
363 42754-2. PMID: 37730917; PMCID: PMC10511501.
- 364 [21] Paterson P, Meurice F, Stanberry LR, Glismann S, Rosenthal SL, Larson HJ. Vaccine  
365 hesitancy and healthcare providers. *Vaccine.* 2016 Dec 20;34(52):6700-06. doi:  
366 10.1016/j.vaccine.2016.10.042. Epub 2016 Oct 31. PMID: 27810314.
- 367 [22] Gaviola GC, McCarville M, Shendale S, Goodman T, Lomazzi M, Desai S. A review  
368 of health worker vaccination programs in low, middle and upper middle-income

- 369 countries. *Public Health Pract (Oxf)*. 2023 Dec;6:100415. doi:  
370 10.1016/j.puhip.2023.100415. PMID: 37547811; PMCID: PMC10400463.
- 371 [23] Puthanakit T, Anugulruengkitt S, Angsuwatcharakon P, Bunjoungmanee P,  
372 Kowitdamrong E, Primsirikunawut A, et al. Low Measles Seropositivity Rate among  
373 Thai Adolescents in the Thai National Immunization Program. *Vaccines (Basel)*. 2022  
374 Aug 6;10(8). doi: 10.3390/vaccines10081269. PMID: 36016157; PMCID:  
375 PMC9412740.
- 376 [24] Measles vaccination coverage. World Health Organization: World Health  
377 Organization; 2023. Available from:  
378 <https://immunizationdata.who.int/pages/coverage/mcv.html?CODE=SEAR&ANTIGE>  
379 [N=MCV2&YEAR=](https://immunizationdata.who.int/pages/coverage/mcv.html?CODE=SEAR&ANTIGE)
- 380 [25] Wanlapakorn N, Wasitthankasem R, Vichaiwattana P, Auphimai C, Yoocharoen P,  
381 Vongpunsawad S, et al. Antibodies against measles and rubella virus among different  
382 age groups in Thailand: A population-based serological survey. *PLoS One*.  
383 2019;14(11):e0225606. doi: 10.1371/journal.pone.0225606. PMID: 31770412;  
384 PMCID: PMC6879141.
- 385 [26] Kumakura S, Shibata H, Onoda K, Nishimura N, Matsuda C, Hirose M.  
386 Seroprevalence survey on measles, mumps, rubella and varicella antibodies in  
387 healthcare workers in Japan: sex, age, occupational-related differences and vaccine  
388 efficacy. *Epidemiol Infect*. 2014 Jan;142(1):12-9. doi: 10.1017/S0950268813000393.  
389 Epub 2013 Apr 11. PMID: 23574767; PMCID: PMC3857110.
- 390 [27] Koivisto K, Puhakka L, Lappalainen M, Blomqvist S, Saxen H, Nieminen T.  
391 Immunity against vaccine-preventable diseases in Finnish pediatric healthcare  
392 workers in 2015. *Vaccine*. 2017 Mar 14;35(12):1608-14. doi:  
393 10.1016/j.vaccine.2017.02.018. Epub 2017 Feb 21. PMID: 28233625.



- 394 [28] von Linstow ML, Yde Nielsen A, Kirkby N, Eltvedt A, Nordmann Winther T, Bybeck  
395 Nielsen A, et al. Immunity to vaccine-preventable diseases among paediatric  
396 healthcare workers in Denmark, 2019. *Euro Surveill.* 2021 Apr;26(17). doi:  
397 10.2807/1560-7917.ES.2021.26.17.2001167. PMID: 33928900; PMCID:  
398 PMC8086246.
- 399 [29] Yun JH, Lee E, Choi JH, Ki HK, Park J. Seroprevalence of Varicella-Zoster Virus  
400 and Measles among Healthcare Workers in a Tertiary Medical Center in Korea.  
401 *Vaccines (Basel)*. 2022 Nov 18;10(11). doi: 10.3390/vaccines10111956. PMID:  
402 36423051; PMCID: PMC9697537.
- 403 [30] Shin L, Choi JR, Huh K, Chung DR, Cho SY, Jeong J, et al. Trend of immunity  
404 against measles and varicella zoster virus in healthcare workers in Korea. *Vaccine*.  
405 2023 Jul 19;41(32):4679-84. doi: 10.1016/j.vaccine.2023.06.018. Epub 2023 Jun 20.  
406 PMID: 37349224.
- 407 [31] Yoo Y, Park WJ, Cho S, Lim DY, Kim S, Kang W, et al. Seroprevalence of measles,  
408 mumps, rubella, and varicella-zoster antibodies in new female nurses in the Republic  
409 of Korea. *Ann Occup Environ Med.* 2021;33:e19. doi: 10.35371/aoem.2021.33.e19.  
410 PMID: 34754480; PMCID: PMC8264122.
- 411  
412  
413  
414  
415  
416  
417  
418

419 **Table 1.** Demographic characteristics of the HCWs included in this study (N=266)

|                                             |             |
|---------------------------------------------|-------------|
| <b>Mean age, years (SD)</b>                 | 38.3 (11.5) |
| <b>Sex</b>                                  | N (%)       |
| Male                                        | 59 (22.2)   |
| Female                                      | 207 (77.8)  |
| <b>Past history of measles</b>              | N (%)       |
| Yes                                         | 15 (5.6)    |
| No                                          | 230 (86.5)  |
| Uncertain                                   | 21 (7.9)    |
| <b>Previous vaccination against measles</b> | N (%)       |
| Yes                                         | 58 (21.8)   |
| No                                          | 75 (28.2)   |
| Uncertain                                   | 133 (50.0)  |
| <b>Past history of varicella</b>            | N (%)       |
| Yes                                         | 128 (48.1)  |
| No                                          | 122 (45.9)  |
| Uncertain                                   | 16 (6.0)    |
| <b>Previous varicella vaccination</b>       | N (%)       |
| Yes                                         | 13 (4.9)    |
| No                                          | 149 (56.0)  |
| Uncertain                                   | 104 (39.1)  |

420 SD = standard deviation

421

422

423 **Table 2.** Seroprevalence of anti-measles IgG in HCWs by age group and sex.

424

| <b>Variables</b>          | <b>No.</b> | <b>Proportion of seroprotected individuals, N (%)</b> | <b>GMT (IU/L) (95% CI)</b> | <b>p-value (One-way ANOVA)</b> |
|---------------------------|------------|-------------------------------------------------------|----------------------------|--------------------------------|
| <b>All</b>                | 266        | 226 (85.0)                                            | 1128.0 (964.5 – 1320.0)    |                                |
| <b>Age groups (years)</b> |            |                                                       |                            |                                |
| <b>21-30</b>              | 88         | 60 (68.2)                                             | 614.8 (454.5 – 831.7)      | Reference                      |
| <b>31-40</b>              | 75         | 65 (86.7)                                             | 1036.5 (783.1 – 1372.0)    | 0.030                          |
| <b>41-50</b>              | 54         | 53 (98.1)                                             | 2095.8 (1584.0 – 2773.0)   | <0.0001*                       |
| <b>51-60</b>              | 43         | 42 (97.7)                                             | 1969.9 (1512.0 – 2567.0)   | <0.0001*                       |
| <b>61-70</b>              | 4          | 4 (100)                                               | 2135.1 (319.1 – 14285.0)   | 0.193                          |
| <b>&gt;70</b>             | 2          | 2 (100)                                               | 1037.4 (2.1 – 522915.0)    | 0.976                          |
| <b>Sex</b>                |            |                                                       |                            |                                |
| <b>Male</b>               | 59         | 52 (88.1)                                             | 1261 (935.7 – 1699.0)      | 0.457                          |
| <b>Female</b>             | 207        | 174 (84.1)                                            | 1093 (909.7 – 1313.0)      |                                |

425 GMT: Geometric mean titer, \* = statistically significant

426

427 **Table 3.** Seroprevalence of anti-VZV IgG in HCWs by age group and sex

428

| <b>Variables</b>          | <b>No.</b> | <b>Proportion of seroprotected individuals, N (%)</b> | <b>GMT (IU/L) (95% CI)</b> | <b>p-value (One-way ANOVA)</b> |
|---------------------------|------------|-------------------------------------------------------|----------------------------|--------------------------------|
| <b>All</b>                | 266        | 216 (81.2)                                            | 394.0 (315.4 – 492.0)      |                                |
| <b>Age groups (years)</b> |            |                                                       |                            |                                |
| <b>21-30</b>              | 88         | 57 (64.8)                                             | 239.6 (148.6 – 386.2)      | Reference                      |
| <b>31-40</b>              | 75         | 63 (84.0)                                             | 326.7 (213.8 – 499.1)      | 0.774                          |
| <b>41-50</b>              | 54         | 50 (92.6)                                             | 617.7 (436.3 – 874.4)      | 0.012*                         |
| <b>51-60</b>              | 43         | 40 (93.0)                                             | 791.4 (553.3 – 1132.0)     | 0.002*                         |
| <b>61-70</b>              | 4          | 4 (100)                                               | 767.1 (127.8 – 4605.0)     | 0.659                          |
| <b>&gt;70</b>             | 2          | 2 (100)                                               | 616.3 (33.1 – 11461.0)     | 0.947                          |
| <b>Sex</b>                |            |                                                       |                            |                                |
| <b>Male</b>               | 59         | 50 (84.7)                                             | 453.3 (268.2 – 766.0)      | 0.508                          |
| <b>Female</b>             | 207        | 166 (80.2)                                            | 378.5 (296.1 – 483.9)      |                                |

429 GMT: Geometric mean titer, \* = statistically significant

430

431 **Table 4.** The Correlation between the serological results of anti-measles anti-VZV IgG with  
432 the self-reported medical history.

433

| <b>Variables</b>              | <b>Total (N=266)</b> | <b>Immune (seroprotected) N (%)</b> | <b>Nonimmune (susceptible) N (%)</b> | <b>p-value</b> |
|-------------------------------|----------------------|-------------------------------------|--------------------------------------|----------------|
| <b>Measles</b>                |                      |                                     |                                      |                |
| <b>History of vaccination</b> |                      |                                     |                                      | 0.064          |
| <b>Yes</b>                    | 58                   | 52 (89.7)                           | 6 (10.3)                             |                |
| <b>No</b>                     | 75                   | 67 (89.3)                           | 8 (10.7)                             |                |
| <b>Uncertain or N/A</b>       | 133                  | 107 (80.5)                          | 26 (19.5)                            |                |
| <b>History of measles</b>     |                      |                                     |                                      | 0.864          |
| <b>Yes</b>                    | 15                   | 13 (86.7)                           | 2 (13.3)                             |                |
| <b>No</b>                     | 230                  | 195 (84.8)                          | 35 (15.2)                            |                |
| <b>Uncertain or N/A</b>       | 21                   | 18 (85.7)                           | 3 (14.3)                             |                |
| <b>Varicella</b>              |                      |                                     |                                      |                |
| <b>History of vaccination</b> |                      |                                     |                                      | <0.001*        |
| <b>Yes</b>                    | 13                   | 10 (76.9)                           | 3 (23.1)                             |                |
| <b>No</b>                     | 149                  | 132 (88.6)                          | 17 (11.4)                            |                |
| <b>Uncertain or N/A</b>       | 104                  | 74 (71.2)                           | 30 (28.8)                            |                |
| <b>History of varicella</b>   |                      |                                     |                                      | 0.018*         |
| <b>Yes</b>                    | 128                  | 115 (89.8)                          | 13 (10.2)                            |                |
| <b>No</b>                     | 122                  | 89 (73.0)                           | 33 (27.0)                            |                |
| <b>Uncertain or N/A</b>       | 16                   | 12 (75.0)                           | 4 (25.0)                             |                |

434 N/A: Data not available.

435

436 **Table 5.** Positive predictive values and negative predictive values of the self-reported history

437 of infection or vaccination.

438

|                  |                               | <b>Positive predictive value (%)</b> | <b>Negative predictive value (%)</b> |
|------------------|-------------------------------|--------------------------------------|--------------------------------------|
| <b>Measles</b>   | <b>History of measles</b>     | 86.67                                | 15.22                                |
|                  | <b>History of vaccination</b> | 89.66                                | 10.67                                |
| <b>Varicella</b> | <b>History of varicella</b>   | 89.84                                | 27.05                                |
|                  | <b>History of vaccination</b> | 76.92                                | 11.41                                |

439

440
